# Supplementary material for: Ionic interaction-induced assemblies of bimolecular “chessboard” structures
Source: Royal Society of Chemistry journal article supplement (doi:10.1039/c7cc03625f), 2017-01-01
Supplement: c7cc03625f1.pdf [file c7cc03625f1.pdf]

## Ionic-interactions-induced assembly of bimolecular “chessboard” structure

*Zhen-Feng Cai<sup>a,b</sup>, Ting Chen<sup>a</sup>, Jing-Ying Gu<sup>a</sup>, Dong Wang<sup>\*,a</sup>, and Li-Jun Wan<sup>\*,a</sup>*

<sup>a</sup> CAS Key Laboratory of Molecular Nanostructure and Nanotechnology, CAS Research/Education Center for Excellence in Molecular Sciences, Institute of Chemistry, Chinese Academy of Sciences (CAS), Beijing 100190, People’s Republic of China

<sup>b</sup> University of Chinese Academy of Sciences, Beijing 100049, People’s Republic of China

## Experimental details

**Chemicals.** The electrolyte used in the STM measurements is 0.1 M HClO<sub>4</sub> solution prepared by diluting 99.999% pure HClO<sub>4</sub> (Sigma-Aldrich Co.) with Milli-Q water (18.2 MΩ cm, total organic carbon < 5 ppb). The Au(111) single-crystal surface was prepared by the Clavilier method. Before each measurement, the Au(111) electrode was further annealed in a hydrogen-oxygen flame and quenched in an ultrapure N<sub>2</sub> atmosphere. TSPP and TTAP were purchased from Sigma-Aldrich Co. and FeTMPyP was purchased from Frontier Scientific Inc.. All chemicals are used without further purification. To prepare a TSPP, TTAP adlayers and hybrid adlayers, the molecules were dissolved in Milli-Q water to form aqueous solution at concentration of 10<sup>-4</sup> M, and then, a pretreated Au(111) electrode was immersed in the as-prepared monocomponent or mixture aqueous solution for 1 minute to acquire molecular monolayer or multilayer.

**STM.** All STM measurements were performed in constant-current mode using a Nanoscope E STM instrument (Bruker). STM tips were electrochemically etched from W wires in 0.6 M KOH and sealed with transparent nail polish to minimize Faradic currents. All potentials were reported with respect to SCE.

**Electrochemistry.** CV measurements were performed on an EG&G PAR 2273 Advanced Electrochemical System (Princeton Applied Research), using the hanging meniscus method in a three-compartment electrochemical cell under an N<sub>2</sub> atmosphere. The commercial Au(111) single crystal was used as a working electrode.

**Theoretical Simulation.** Molecular assembly structures were built and optimized with Forcite modulus. Dreiding was chosen as the force field to perform geometry optimization to get the blend at the lowest energy. The structures at lowest energy can be demonstrated when the geometry

optimization is finished running, and then the molecular interaction energy consists of valence and non-bond energy can be obtained.

Table S1 | Simulated energy (in kcal mol<sup>-1</sup>) of different monolayer structures in Figure 2-4

|               | FeTMPyP-TSPP | TTAP-TSPP | TSPP  | TTAP  | FeTMPyP |
|---------------|--------------|-----------|-------|-------|---------|
| $\Delta E$    | −79.88       | −61.55    | 6.21  | 21.87 | —       |
| Electrostatic | −73.88       | −56.63    | 12.59 | 25.49 | —       |
| van der Waals | −2.71        | −3.77     | −8.04 | −5.36 | —       |

$\Delta E$  represents the total molecular interaction energy changes from isolated molecules to self-assembly structure, which can be generated from valence and/or non-bond energy.

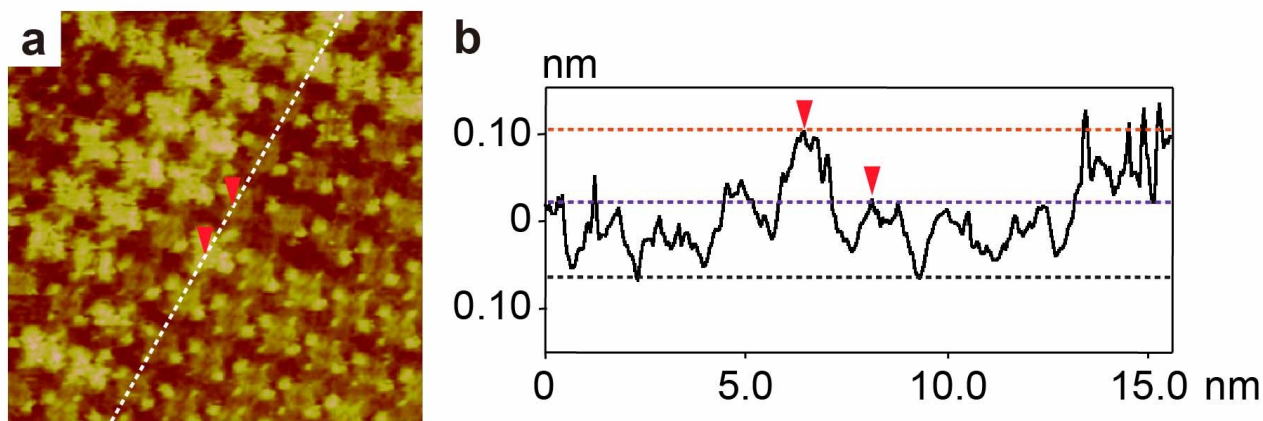

Figure S1 | (a) High-resolution STM images of TTAP adlayer in 0.1 M  $\text{HClO}_4/\text{Au}(111)$  interface; (b) Cross-section profiles along the white dotted line in (a); Image conditions: (a)  $E = 41$  mV,  $E_{\text{bias}} = -330$  mV,  $I_t = 1.000$  nA;

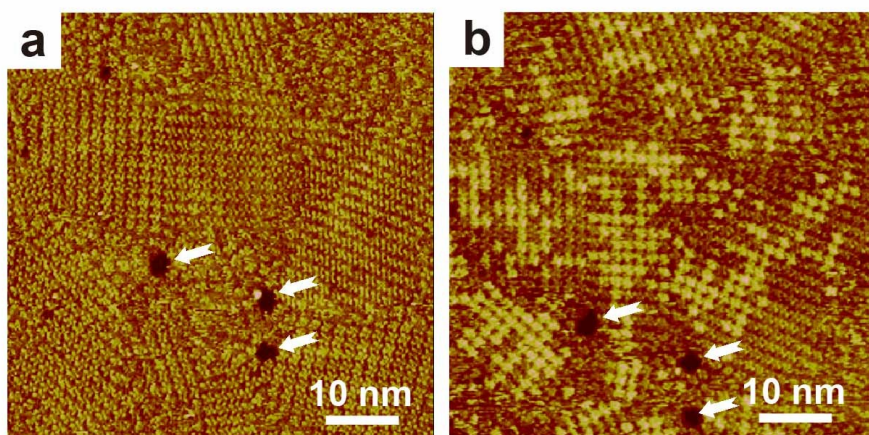

Figure S2 | Sequential STM images taken under different potentials recorded the formation of the TTAP bilayer structure. Image conditions: (a)  $E = 350$  mV,  $E_{\text{bias}} = -369$  mV,  $I_t = 1.000$  nA; (b)  $E = 41$  mV,  $E_{\text{bias}} = -330$  mV,  $I_t = 1.000$  nA;

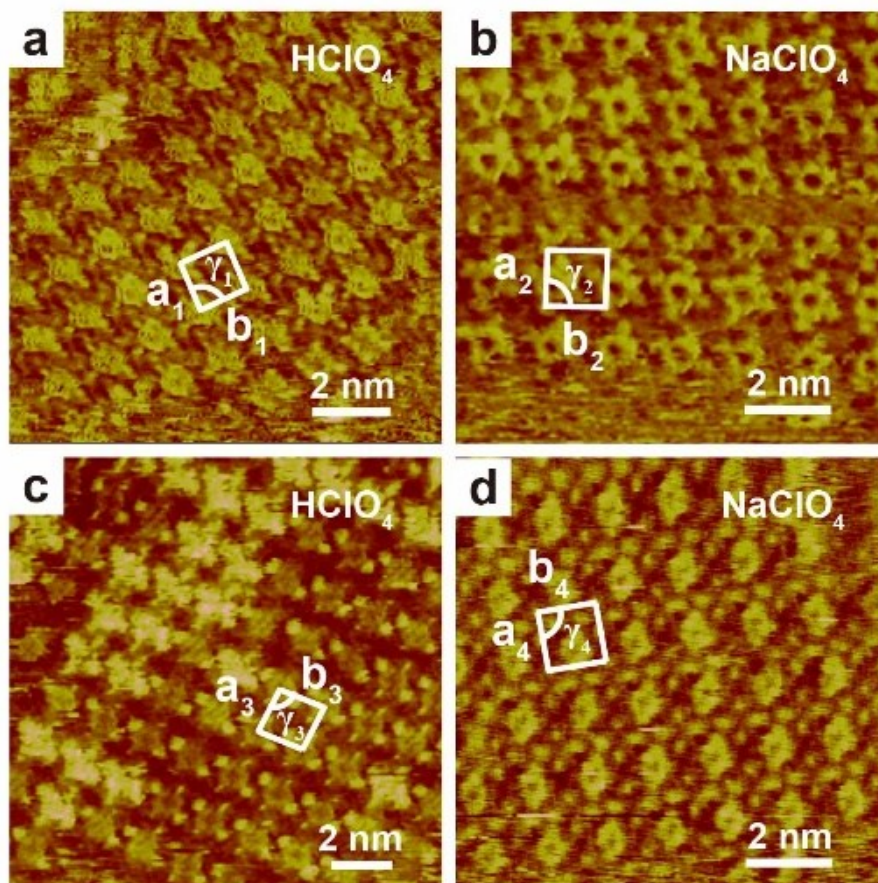

Figure S3 | (a – b) STM images of TSPP monolayer in 0.1 M HClO<sub>4</sub>/Au(111) interface and 0.1 M NaClO<sub>4</sub>/Au(111) interface; (c – d) STM images of TTAP monolayer in 0.1 M HClO<sub>4</sub>/Au(111) interface and 0.1 M NaClO<sub>4</sub>/Au(111) interface; Image conditions: (a)  $E = 350$  mV,  $E_{\text{bias}} = -593$  mV,  $I_t = 6.000$  nA; (b)  $E = 350$  mV,  $E_{\text{bias}} = -355$  mV,  $I_t = 2.388$  nA; (c)  $E = 41$  mV,  $E_{\text{bias}} = -330$  mV,  $I_t = 1.000$  nA; (d)  $E = 350$  mV,  $E_{\text{bias}} = -572$  mV,  $I_t = 2.500$  nA;



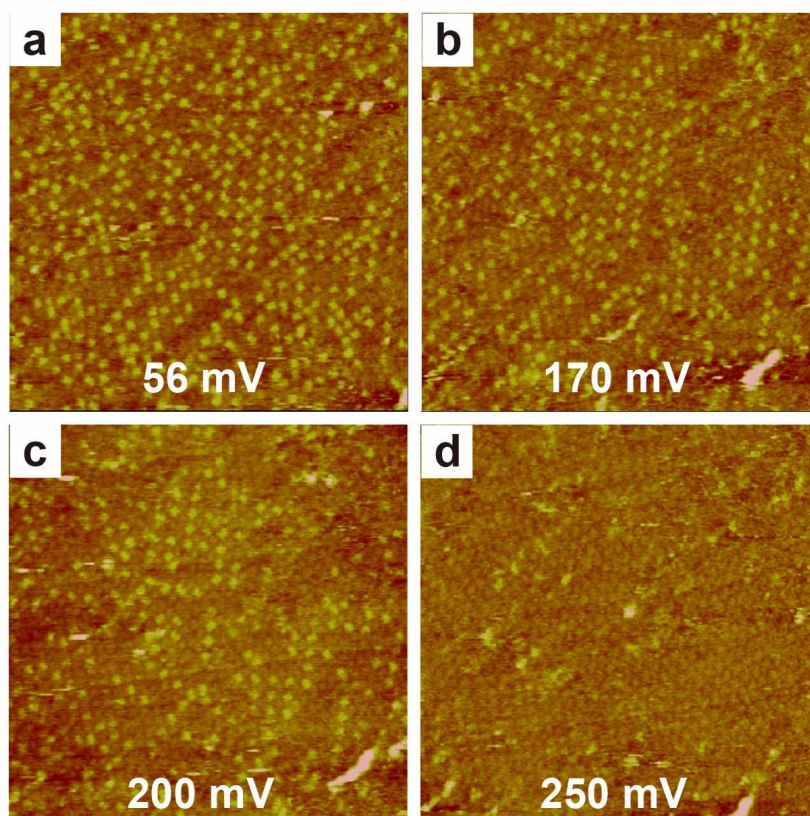

Figure S4 | Sequential STM images taken under different potentials recorded the desorption process of the TTAP molecules on the 2D bimolecular chessboard structure. Image conditions: (a)  $E = 56 \text{ mV}$ ,  $E_{\text{bias}} = -380 \text{ mV}$ ,  $I_t = 2.200 \text{ nA}$ ; (b)  $E = 70 \text{ mV}$ ,  $E_{\text{bias}} = -380 \text{ mV}$ ,  $I_t = 2.200 \text{ nA}$ ; (c)  $E = 170 \text{ mV}$ ,  $E_{\text{bias}} = -380 \text{ mV}$ ,  $I_t = 2.200 \text{ nA}$ ; (d)  $E = 200 \text{ mV}$ ,  $E_{\text{bias}} = -380 \text{ mV}$ ,  $I_t = 2.200 \text{ nA}$ ; (e)  $E = 250 \text{ mV}$ ,  $E_{\text{bias}} = -380 \text{ mV}$ ,  $I_t = 2.200 \text{ nA}$ ;



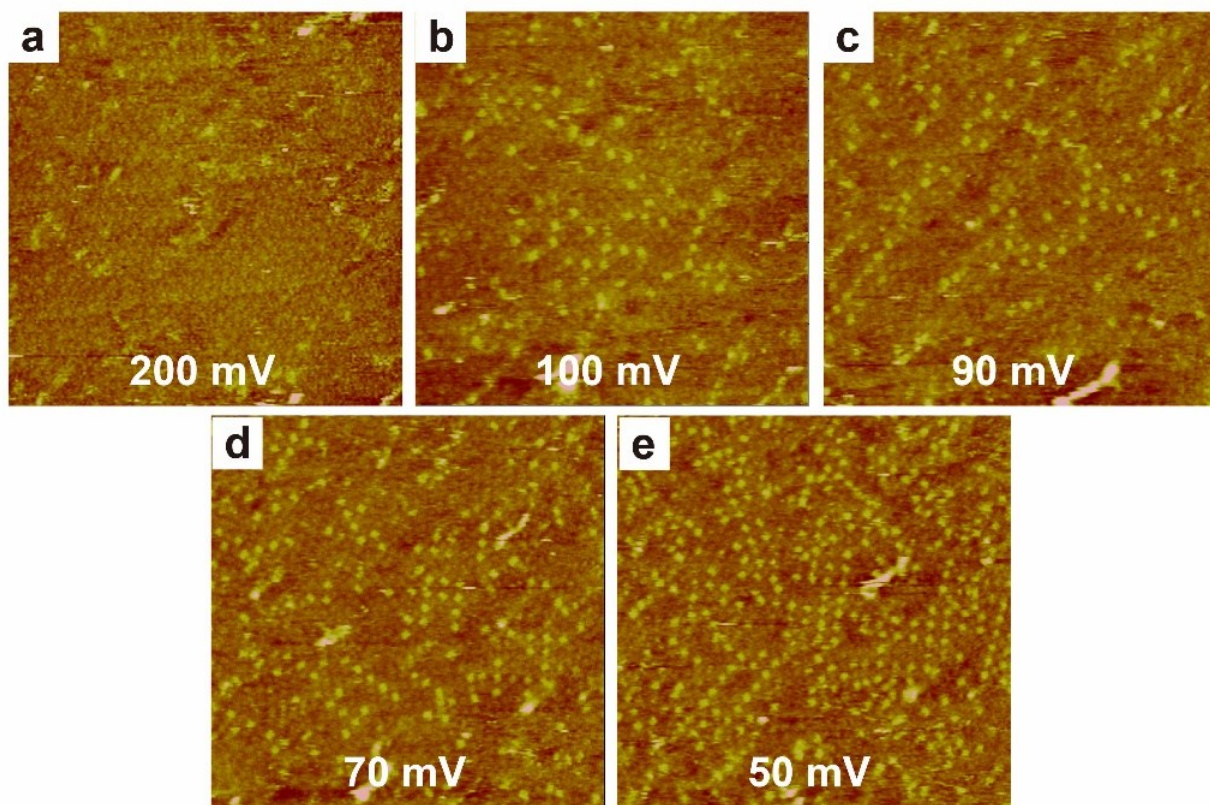

Figure S5 | Sequential STM images taken under different potentials recorded the formation process of the bilayer chessboard structure formed by TTAP and TSPP. Image conditions: (a)  $E = 200 \text{ mV}$ ,  $E_{\text{bias}} = -550 \text{ mV}$ ,  $I_t = 2.200 \text{ nA}$ ; (b)  $E = 100 \text{ mV}$ ,  $E_{\text{bias}} = -550 \text{ mV}$ ,  $I_t = 2.200 \text{ nA}$ ; (c)  $E = 90 \text{ mV}$ ,  $E_{\text{bias}} = -550 \text{ mV}$ ,  $I_t = 2.200 \text{ nA}$ ; (d)  $E = 70 \text{ mV}$ ,  $E_{\text{bias}} = -550 \text{ mV}$ ,  $I_t = 2.200 \text{ nA}$ ; (e)  $E = 50 \text{ mV}$ ,  $E_{\text{bias}} = -550 \text{ mV}$ ,  $I_t = 2.200 \text{ nA}$ ;

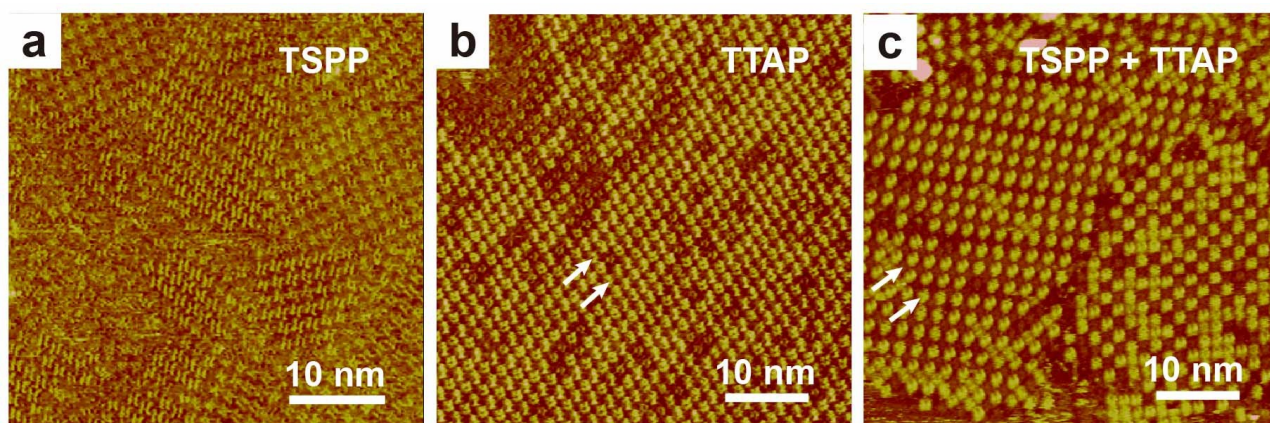

Figure S6 | Large-scale STM images of (a) TSPP monolayer, (b) TTAP bilayer and chessboard bilayer structure on Au(111) surface; Image conditions: (a)  $E = 350 \text{ mV}$ ,  $E_{\text{bias}} = -383 \text{ mV}$ ,  $I_t = 0.983 \text{ nA}$ ; (b)  $E = 50 \text{ mV}$ ,  $E_{\text{bias}} = -231 \text{ mV}$ ,  $I_t = 2.272 \text{ nA}$ ; (c)  $E = 50 \text{ mV}$ ,  $E_{\text{bias}} = -699 \text{ mV}$ ,  $I_t = 1.236 \text{ nA}$ .

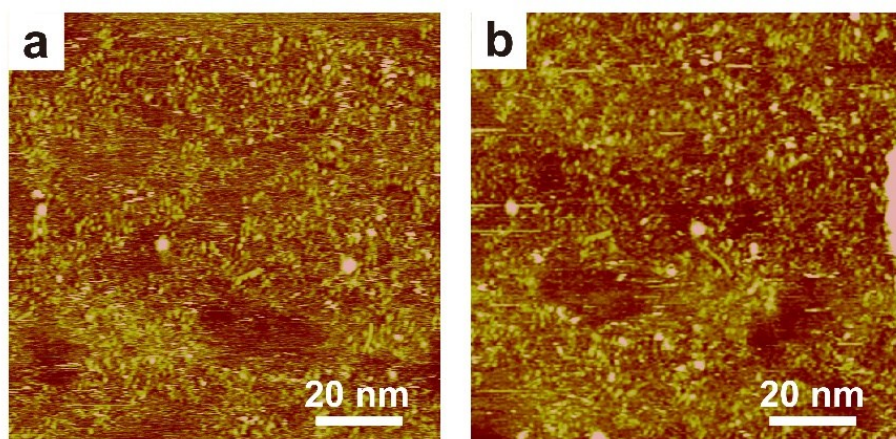

Figure S7 | FeTMPyP monolayer. (a – b) Large-scale STM images of FeTMPyP monolayer on Au(111) surface. Image conditions: (a – b)  $E = 350$  mV,  $E_{\text{bias}} = -422$  mV,  $I_t = 1.000$  nA.

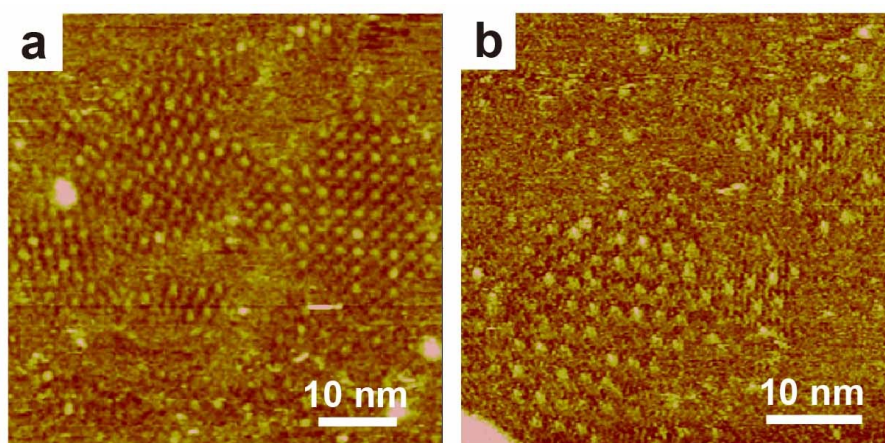

Figure S8 | Large-scale STM images of single-layer bimolecular chessboard structure. (a – b) Large-scale STM images of 2D bimolecular chessboard monolayer formed by FeTMPyP and TSPP on Au(111) surface. Image conditions: (a)  $E = 50$  mV,  $E_{\text{bias}} = -193$  mV,  $I_t = 1.000$  nA; (b)  $E = 50$  mV,  $E_{\text{bias}} = -214$  mV,  $I_t = 1.000$  nA.



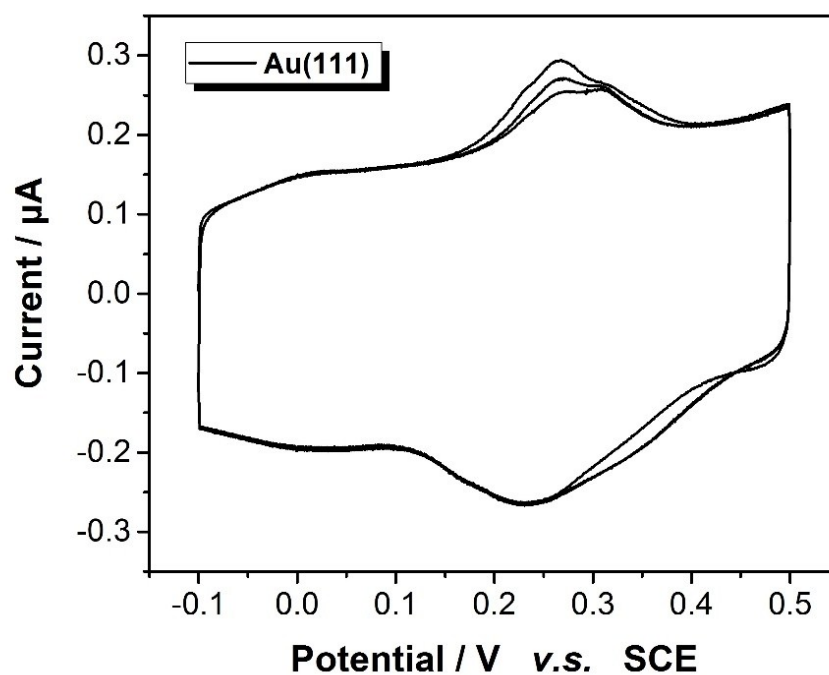

Figure S9 | Cyclic voltammogram of bare Au(111) electrode in 0.1 M  $\text{HClO}_4$ . CV was recorded in a  $\text{N}_2$  atmosphere at a scan rate of  $50 \text{ mV s}^{-1}$ .

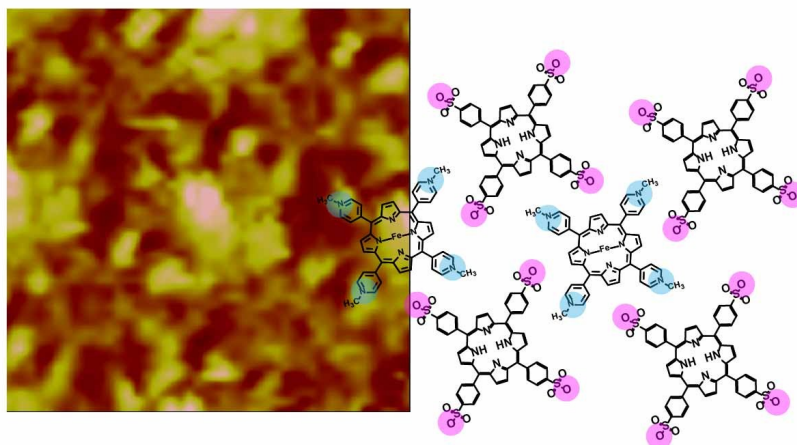

Figure S10 | High-resolution STM image and proposed structural model of the 2D bimolecular chessboard monolayer formed by FeTMPyP and TSPP on Au(111) surface. Image conditions:  $E = 350$  mV,  $E_{\text{bias}} = -214$  mV,  $I_t = 1.000$  nA.
